# Supplementary material for: VIRMA mediates preferential m6A mRNA methylation in 3′UTR and near stop codon and associates with alternative polyadenylation
Source: PubMed Central journal article supplement (PMC5826926; doi:10.1038/s41421-018-0019-0), 2018-02-27
Supplement: 41421_2018_19_MOESM2_ESM.pdf [file 41421_2018_19_MOESM2_ESM.pdf]

**Supplementary Table S2 Brief summary of high throughput sequencing data<sup>a</sup>**

| No. | Samples                                     | Raw reads   | Mappable reads | Mappableratio <sup>b</sup> |
|-----|---------------------------------------------|-------------|----------------|----------------------------|
| 1   | Ctrl-Input1                                 | 55,597,529  | 47,313,497     | 0.851                      |
| 2   | Ctrl-Input2                                 | 64,072,102  | 53,692,421     | 0.838                      |
| 3   | Ctrl-m <sup>6</sup> A-IP1                   | 24,143,793  | 19,942,773     | 0.826                      |
| 4   | Ctrl-m <sup>6</sup> A-IP2                   | 57,519,817  | 47,051,210     | 0.818                      |
| 5   | VIRMA-Mut-Input1                            | 48,195,956  | 40,629,190     | 0.843                      |
| 6   | VIRMA-Mut-Input2                            | 96,802,916  | 80,443,223     | 0.831                      |
| 7   | VIRMA-Mut-m <sup>6</sup> A-IP1              | 24,471,921  | 19,161,514     | 0.783                      |
| 8   | VIRMA-Mut-m <sup>6</sup> A-IP2              | 74,883,968  | 58,035,075     | 0.775                      |
| 9   | Ctrl-PE-Input1                              | 105,409,978 | 90,847,257     | 0.862                      |
| 10  | Ctrl-PE-Input2                              | 92,685,858  | 77,196,032     | 0.833                      |
| 11  | Ctrl-PE-m <sup>6</sup> A-IP1                | 160,231,915 | 137,661,993    | 0.859                      |
| 12  | Ctrl-PE-m <sup>6</sup> A-IP2                | 118,647,121 | 98,561,493     | 0.831                      |
| 13  | VIRMA-Mut-PE-Input1                         | 167,345,956 | 153,763,315    | 0.919                      |
| 14  | VIRMA-Mut-PE-Input2                         | 100,602,262 | 93,748,630     | 0.932                      |
| 15  | VIRMA-Mut-PE-m <sup>6</sup> A-IP1           | 104,734,545 | 97,665,586     | 0.933                      |
| 16  | VIRMA-Mut-PE-m <sup>6</sup> A-IP2           | 110,636,259 | 102,603,591    | 0.927                      |
| 17  | VIRMA-RIP Input1 <sup>c</sup>               | 95,885,008  | 75,269,731     | 0.785                      |
| 18  | VIRMA-RIP Input2 <sup>c</sup>               | 75,525,136  | 60,269,058     | 0.798                      |
| 19  | VIRMA-RIP-IP1 <sup>c</sup>                  | 65,691,212  | 20,758,422     | 0.316                      |
| 20  | VIRMA-RIP-IP2 <sup>c</sup>                  | 53,309,821  | 21,217,308     | 0.398                      |
| 21  | Wild-Ctrl-Input1 <sup>c</sup>               | 87,982,606  | 75,401,093     | 0.857                      |
| 22  | Wild-Ctrl-Input2 <sup>c</sup>               | 55,543,410  | 44,767,988     | 0.806                      |
| 23  | Wild-Ctrl-m <sup>6</sup> A-IP1 <sup>c</sup> | 79,509,346  | 68,775,584     | 0.865                      |
| 24  | Wild-Ctrl-m <sup>6</sup> A-IP2 <sup>c</sup> | 87,863,226  | 73,365,793     | 0.835                      |
| 25  | METTL3-Mut-Input1                           | 113,320,039 | 103,914,475    | 0.917                      |
| 26  | METTL3-Mut-Input2                           | 47,168,770  | 43,772,618     | 0.928                      |
| 27  | METTL3-Mut-IP1                              | 51,338,209  | 43,380,786     | 0.845                      |
| 28  | METTL3-Mut-IP2                              | 69,046,091  | 58,620,131     | 0.849                      |
| 29  | siCtrl-1                                    | 62,405,838  | 48,676,553     | 0.780                      |
| 30  | siCtrl-2                                    | 78,398,888  | 61,856,722     | 0.789                      |
| 31  | siCtrl-m <sup>6</sup> A-IP1                 | 52,278,909  | 45,587,208     | 0.872                      |
| 32  | siCtrl-m <sup>6</sup> A-IP2                 | 59,604,940  | 50,664,199     | 0.850                      |
| 33  | siCPSF5-1 <sup>d</sup>                      | 60,298,336  | 45,284,050     | 0.751                      |
| 34  | siCPSF5-2 <sup>d</sup>                      | 229,749,097 | 182,191,034    | 0.793                      |
| 35  | siCPSF5-m <sup>6</sup> A-IP1 <sup>d</sup>   | 49,315,231  | 37,430,260     | 0.759                      |
| 36  | siCPSF5-m <sup>6</sup> A-IP2 <sup>d</sup>   | 65,009,905  | 54,933,369     | 0.845                      |
| 37  | siZC3H13-1 <sup>e</sup>                     | 91,340,429  | 72,432,960     | 0.793                      |
| 38  | siZC3H13-2 <sup>e</sup>                     | 32,231,869  | 21,885,439     | 0.679                      |
| 39  | siZC3H13-m <sup>6</sup> A-IP1 <sup>e</sup>  | 90,635,657  | 73,686,789     | 0.813                      |

|    |                                            |             |             |       |
|----|--------------------------------------------|-------------|-------------|-------|
| 40 | siZC3H13-m <sup>6</sup> A-IP2 <sup>e</sup> | 124,874,423 | 102,022,404 | 0.817 |
| 41 | siCtrl-for HAKAI-1                         | 72,648,322  | 60,370,755  | 0.831 |
| 42 | siCtrl-for HAKAI-2                         | 86,436,500  | 72,001,604  | 0.833 |
| 43 | siCtrl-for HAKAI-m <sup>6</sup> A-IP1      | 60,841,492  | 51,471,902  | 0.846 |
| 44 | siCtrl-for HAKAI-m <sup>6</sup> A-IP2      | 121,318,427 | 105,061,758 | 0.866 |
| 45 | siHAKAI-1 <sup>f</sup>                     | 46,096,632  | 39,781,393  | 0.863 |
| 46 | siHAKAI-2 <sup>f</sup>                     | 54,773,938  | 47,050,812  | 0.859 |
| 47 | siHAKAI-m <sup>6</sup> A-IP1 <sup>f</sup>  | 64,197,384  | 54,375,184  | 0.874 |
| 48 | siHAKAI-m <sup>6</sup> A-IP2 <sup>f</sup>  | 85,650,847  | 75,115,792  | 0.877 |
| 49 | siCtrl-for VIRMA-1                         | 54,197,474  | 49,345,604  | 0.910 |
| 50 | siCtrl-for VIRMA-2                         | 30,221,930  | 27,547,503  | 0.912 |
| 51 | siCtrl-for VIRMA-m <sup>6</sup> A-IP1      | 47,367,315  | 41,308,384  | 0.872 |
| 52 | siCtrl-for VIRMA-m <sup>6</sup> A-IP2      | 46,462,849  | 40,549,305  | 0.873 |
| 53 | siVIRMA-1 <sup>g</sup>                     | 42,409,759  | 38,697,076  | 0.912 |
| 54 | siVIRMA-2 <sup>g</sup>                     | 45,903,034  | 42,066,729  | 0.916 |
| 55 | siVIRMA-m <sup>6</sup> A-IP1 <sup>g</sup>  | 48,759,125  | 44,219,723  | 0.907 |
| 56 | siVIRMA-m <sup>6</sup> A-IP2 <sup>g</sup>  | 48,877,923  | 44,400,333  | 0.908 |

<sup>a</sup>Sequencing was performed using single end of 50 bp for samples 1–8 and pair end of 150 bp for rest samples. Samples 1–8, 9–16, 17-28, 29–48, and 49–56 were prepared and sequenced in the same batches, respectively. Two biological replicates for each experimental condition in HeLa cell. The same siRNA control was used for CPSF5 and ZC3H13 knockdowns. Ctrl = Control; VIRMA-Mut = *VIRMA*<sup>mut/-</sup> construct 1; METTL3-Mut = *METTL3*<sup>mut/-</sup>; PE = pair end of 150 bp sequencing, IP = immunoprecipitation; RIP = RNA immunoprecipitation. <sup>b</sup>Mappable ratio = Mappable reads/Raw reads. <sup>c</sup>The wild-type control m<sup>6</sup>A-seq data and VIRMA RIP-seq data was obtained in the same batch and was used for comparison in bioinformatic analysis. <sup>d</sup>The siRNA named siCPSF5-1 in Supplementary Table 9 was used. <sup>e</sup>The siRNA named siZC3H13-1 in Supplementary Table 9 was used. <sup>f</sup>The siRNA named siHAKAI-1 in Supplementary Table 9 was used. <sup>g</sup>The siRNA named siVIRMA-1 in Supplementary Table 9 was used.
