# Supplementary material for: VIRMA mediates preferential m6A mRNA methylation in 3′UTR and near stop codon and associates with alternative polyadenylation
Source: PubMed Central journal article supplement (PMC5826926; doi:10.1038/s41421-018-0019-0), 2018-02-27
Supplement: 41421_2018_19_MOESM11_ESM.pdf [file 41421_2018_19_MOESM11_ESM.pdf]

## Supplementary information

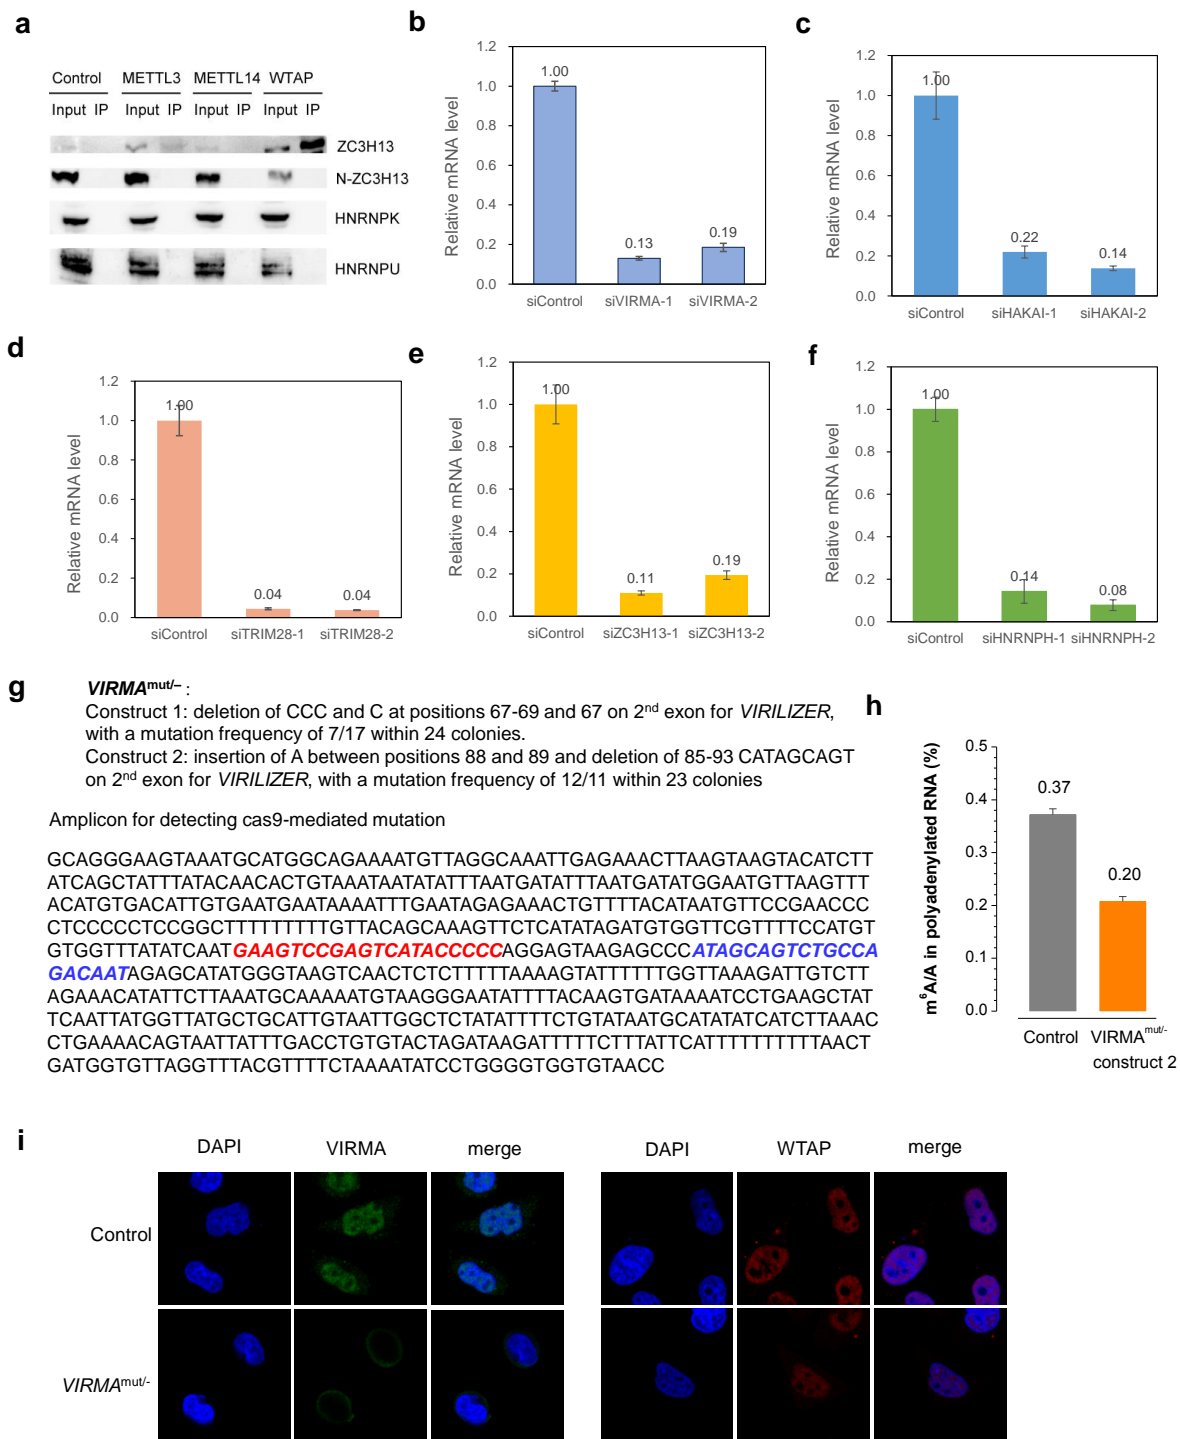

**Supplementary Figure S1** (a) Validation of selected common targets, ZC3H13, HNRNPK and HNRNPU by western blotting. Flag-tagged full length ZC3H13 and N-terminal ZC3H13 (N-ZC3H13) were tested using Flag antibody after HA IP of METTL3, METTL14, and WTAP stable cell lines. (b-f) The qPCR results of siRNA knockdowns of *VIRMA*, *HAKAI*, *TRIM28*, *ZC3H13*, and *HNRNPH*, respectively, by using two independent siRNA sequences.

*P* values calculated using one-tailed Student's *t*-test between control and knockdown samples were less than 0.05. **(g)** CRISPR-cas9 was used to generate the *VIRMA*<sup>mut/-</sup> cell lines. The sequence in red and blue are the sgRNA-targeted regions for constructs 1 and 2. The PCR-amplified genomic sequence containing the sgRNA-targeted region is shown. The gene-editing result was derived from TA-cloning. **(h)** Comparison of m<sup>6</sup>A levels in polyadenylated nuclear RNAs in between control and *VIRMA*<sup>mut/-</sup> construct-2 HeLa cell lines. Data is represented as means ± SEM of *n* = 3. *P* values calculated using one-tailed Student's *t*-test between control and *VIRMA*<sup>mut/-</sup> samples are less than 0.001. **(i)** Immunostains of VIRMA and WTAP were compared between *VIRMA*<sup>mut/-</sup> and control cell lines.

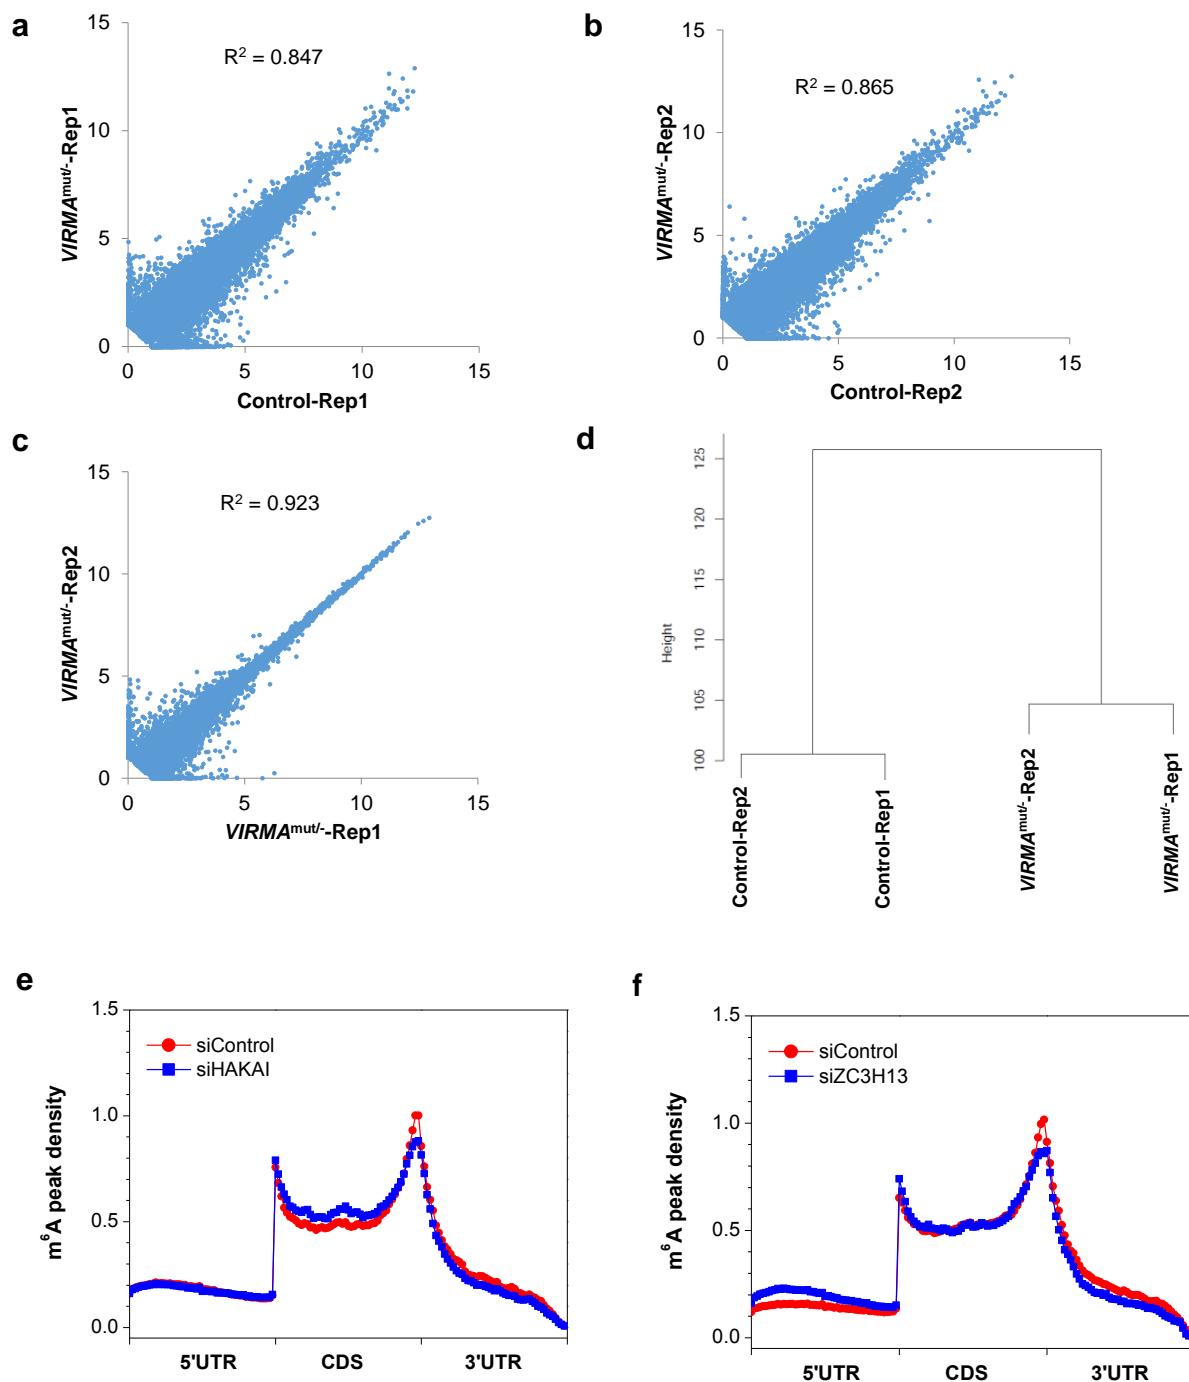

**Supplementary Figure S2** (a, b) RNA-seq analysis for control and *VIRMA*<sup>mut/-</sup> cell lines (2 replicates for each). Scatter plots for the expression comparison between control and *VIRMA*<sup>mut/-</sup>. Each dot represents one gene with expression FPKM value calculated by Cufflinks. The Fig. indicates R-squared value in order to show the relationship between two series of data. (c) Scatter plot for expression comparison between two *VIRMA*<sup>mut/-</sup> replicates. (d) Clustering analysis for 2 control samples and 2 *VIRMA*<sup>mut/-</sup> samples. (e, f) Effects of depletion of *HAKAI* (e) and *ZC3H13* (f) by siRNA knockdown on the profiles of m<sup>6</sup>A peak density along mRNA transcript.

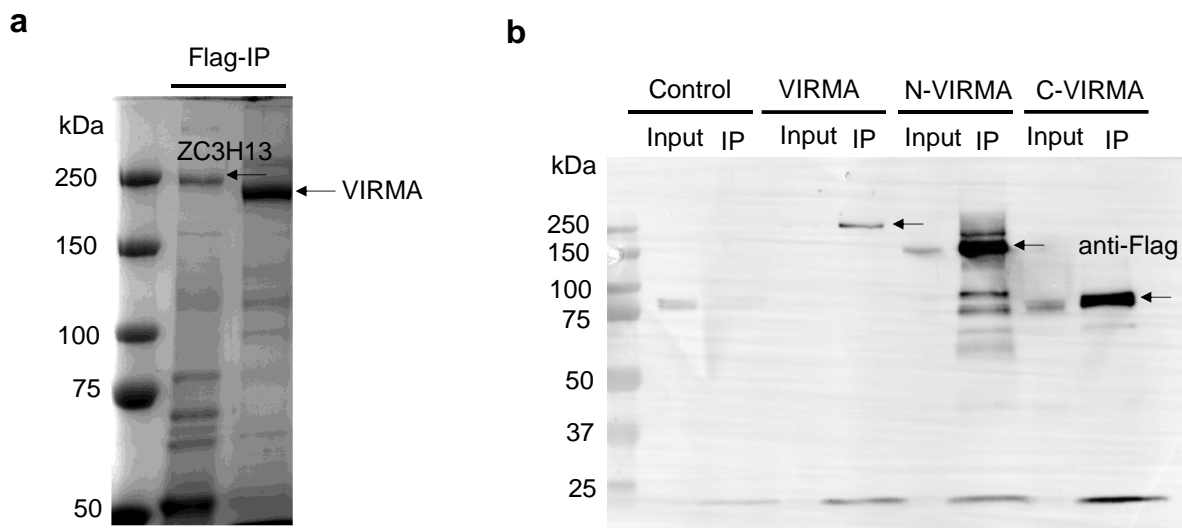

**Supplementary Figure S3 (a)** Commassie blue staining image of PAGE gel of IP products of Flag-tagged VIRMA and ZC3H13 overexpressed in HEK 293FT cells. **(b)** Western blots of IP products of Flag-tagged VIRMA and its truncated forms, including N-term and C-term. All these constructs were overexpressed in HeLa cells.

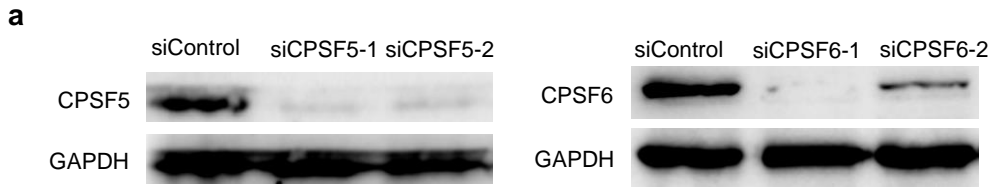

**b** *METTL3*<sup>mut/-</sup>: deletion of CT and TGC at positions 125-126 and 123-125 of 3<sup>rd</sup> exon for *METTL3* with a mutation frequency of 22/8 within 30 colonies

Amplicon for detecting cas9-mediated mutation

TCCACGGTAATGACCTGACAGAGTTAGGATTTACCACTTATTTTCAGTTCACGGTCAGTGTCTTATTGCCACATACCT  
 CCCTCGTTCTCTAGCCAGATGCTCCTGCCACTCAAGATGGGGTAGAAAGCCTCCTGCAGAAGTTTGCAGCTCAG  
 GAGTTGATTGAGGTAAGCGAGGTCTCCTACAAGATGATGCACATCTACTTGTAACT **ATGCTGACCATTCCA**  
**AGCTC**TCTGCCATGATGGGTGCTGTGGCAGAAAAGAAGGCCCTGGGGAGGTAGCAGGGACTGTCACAGGGCA  
 GAAGCGCGTGCAGAACAGGACTCGACTACAGTAGCTGCCTTTGCCAGTTCGTTAGTCTCTGGTCTGAACTCTTC  
 AGCATCGGAACCAGCAAAGGAGCCAGCCAAGAAATCAAGGAAACATGCTGCCTCAGATGTTGATC

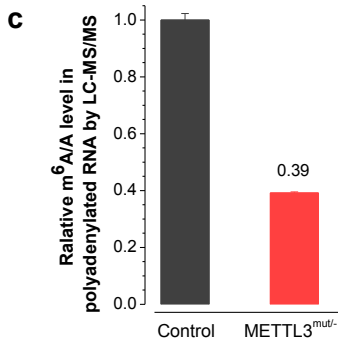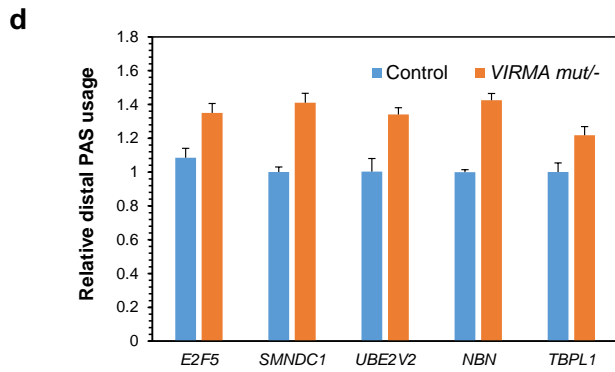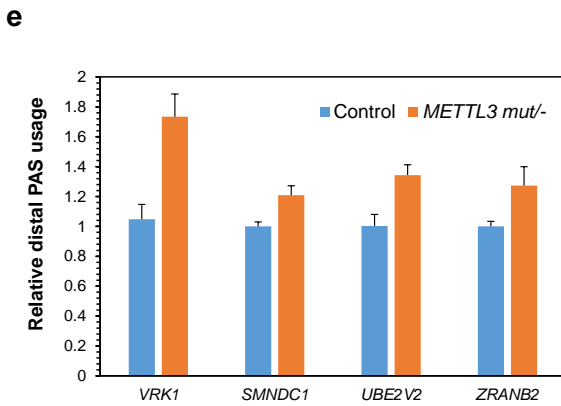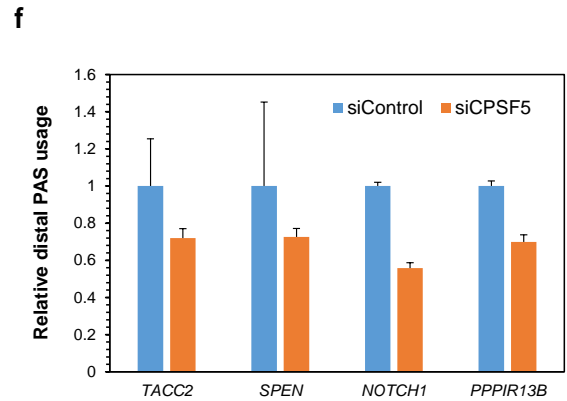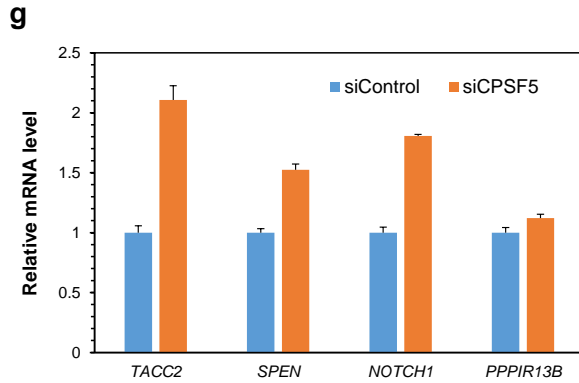

**Supplementary Figure S4** (a) Western blots showing siRNA knockdowns of CPSF5 and CPSF6, respectively, by using two independent siRNA sequences. GAPDH was used as an internal control. (b) The *METTL3*<sup>mut/-</sup> cell line was generated by CRISPR-cas9. The sequence in italic and red is the sgRNA-targeted region. The PCR-amplified genomic sequence containing the sgRNA-targeted region is shown. The gene-editing result was derived from TA-cloning. (c) Comparison of mRNA m<sup>6</sup>A level in between control and *METTL3*<sup>mut/-</sup> cell lines. The m<sup>6</sup>A level was measured using UHPLC-QQQ-MS/MS. *P* values calculated using one-tailed Student's *t*-test between control and *METTL3*<sup>mut/-</sup> samples are less than 0.001. Data are represented as means ± SEM of *n* = 3. (d, e) Validation of selected targets with 3'UTR lengthening in *VIRMA*<sup>mut/-</sup> and *METTL3*<sup>mut/-</sup> versus control cells. *P* values calculated using one-tailed Student's *t*-test between control and mutants samples are less than 0.05. Data are represented as means ± SEM of *n* = 3. (f, g) Comparison of distal PAS usage and mRNA level of selected m<sup>6</sup>A-containing genes under siControl and siCPSF5 quantified by qPCR. *P* values calculated using one-tailed Student's *t*-test between control and mutants samples are less than 0.05. Data are represented as means ± SEM of *n* = 3.

#### **Human *VIRMA* full length (KIAA1429 Isoform 1, NM\_015496.4)**

Nucleotide sequence: 5439 nt (Sequence in red is defined as *VIRMA* C-terminal)

ATGGCGGTGGACTCGGCGATGGAGCTGTTATTTTTAGATACTTTTAAACACCCGAG  
CGCTGAGCAAAGTTCTCATATAGATGTGGTTCGTTTTCCATGTGTGGTTTATATCAA  
TGAAGTCCGAGTCATACCCCCAGGAGTAAGAGCCCATAGCAGTCTGCCAGACAAT  
AGAGCATATGGAGAGACATCTCCCCATACATTTCAATTAGACTTATTCTTCAACAAT  
GTAAGCAAACCAAGTGCCCCTGTTTTCGATAGGTTGGGAAGCCTGGAATATGATG  
AGAATACTTCCATCATCTTTAGACCTAACTCAAAGGTGAATACTGATGGTCTGGTG  
CTAAGAGGCTGGTATAACTGTCTGACACTGGCAATATATGGATCAGTGGATAGAGT  
GATAAGTCATGACAGAGACTCTCCACCACCACCACCTCCACCGCCACCACCTCCC  
CAGCCACAACCAAGTTTGAAAAGGAATCCAAAACATGCTGATGGGGAGAAAGAA  
GATCAGTTTAATGGAAGCCCTCCAAGACCACAGCCAAGGGGACCAAGAAGCTCCTC  
CAGGACCCCTCCACCTGATGATGATGAAGATGATCCTGTGCCTCTGCCAGTGTCT  
GGTGACAAGGAAGAGGATGCTCCTCATAGAGAAGATTACTTTGAGCCATTTCTC  
CTGATCGGAATTCTGTTCCCCAGGAAGGGCAATATTCTGATGAAGGAGAAGTAGA  
AGAGGAACAACAAGAAGAAGGAGAAGAAGATGAAGATGATGTGGATGTAGAGG  
AAGAAGAGGATGAGGATGAGGATGATCGACGAACAGTAGACAGTATTCCTGAGG  
AGGAAGAGGAAGATGAAGAGGAAGAAGGTGAAGAGGATGAAGAAGGTGAAGGG  
GATGATGGTTATGAACAAATTTCCAGTGATGAAGATGGAATTGCTGACTTGGAACG  
TGAAACATTTAAGTATCCAAACTTTGATGTTGAATACACTGCTGAAGACTTAGCTT  
CAGTTCCCTCCTATGACATATGATCCATATGACAGGGAGCTTGTACCCTCTTATACT  
TCAGTTGTCCATACAAGACTACTTTTGAAATTGAAATCAGTAGAATGAAGGATCAA  
GGTCCAGATAAAGAAAATTCAGGGGCAATCGAAGCCTCAGTGAAGTTAACAGAA  
CTCTTAGATTTGTATAGAGAAGATAGAGGTGCAAAATGGGTAACAGCTTTAGAAGA  
AATTCOAAGTTTAATAATAAAAAGGGTTAAGCTATTTGCAATTGAAAAACACAAAAC  
AAGACTCCCTTGGCCAGTTGGTAGACTGGACCATGCAAGCTTTAAATTTACAAGTA

GCGCTTCGCCAACCTATCGCCTTAAATGTTTCGACAGCTCAAAGCTGGGACCAAATT  
AGTGTCTCACTAGCAGAATGTGGGGCTCAAGGAGTTACAGGACTGCTACAAGCA  
GGAGTGATCAGTGGATTATTTGAACTTCTGTTTGTCTGATCACGTATCATCTTCTCTT  
AAGTTAAATGCTTTTAAAGCTTTGGACAGTGTATTAGTATGACAGAAGGAATGGA  
AGCTTTTTTAAGAGGTAGGCAGAATGAAAAAGTGGTTATCAAAGCTTCTGGAA  
CTCATACTTTTAGATCAGACTGTGAGGGTTGTTACTGCTGGTTCAGCTATTCTCCAA  
AAATGCCATTTCTATGAAGTCTTGTTCAGAGATTAAGACTTGGTGACCATTTAGC  
AGAGAAGACTTCATCTCTTCCCTAACACAGTGAACCTGATCACGACACAGATGCT  
GGACTTGAGAGAACAACCCAGAATATGAAAATGAGGGTGGAAAGCTTCTATGGATA  
TGGATCTTTTGGAACTCTCAAATATAAGTGAAGGGGAAATAGAAAGGCTTATTAAC  
CTCCTAGAAGAAGTTTTTCATTTAATGGAACTGCCCTCATACAATGATCCAACA  
ACCTGTAAAGTCTTTCCCAACGATGGCACGAATTACTGGACCTCCAGAGAGGGAT  
GATCCATACCCTGTTCTCTTTAGATATCTTCACAGTCATCACTTCTTGGAGTTGGTT  
ACCTTGCTTCTGTCAATTCAGTAACAAGTGCTCACCTGGTGTGCTGCAAGCCAC  
AAAAGATGTTTTGAAGTTTCTTGCACAGTCACAGAAGGGTCTTCTTTTTTTTATGT  
CGGAATATGAAGCAACAATTTATTGATCCGAGCTCTGTGTCACTTTTATGATCAAG  
ATGAGGAGGAAGGTCTCCAATCTGATGGTGTATTGATGATGCATTTGCCTTGTGG  
CTACAGGACTCAACACAGACATTGCAATGTATTACAGAAGTGTTCAGCCATTTTCA  
GCGTTGTACAGCCAGTGAAGAAACAGACCATTGAGATCTCTGGGAACCCTGCAC  
AATCTTTATTTGATTACTTTTAATCCTGTGGGAAGATCAGCTGTTGGCCATGTTTTTA  
GTCTGGAGAAAATCTCCAAAGTCTTATTACTCTAATGGAGTACTATTCCAAAGAA  
GCCTTGGGTGATTCCAAATCTAAGAAGTCAGTAGCTTATAATTACGCATGCATACTT  
ATTTGGTGGTGGTTCAGTCTTCCAGTGATGTTCAAATGCTAGAACAACATGCAGC  
ATCTCTTTGAAGCTTTGTAAAGCAGATGAAAATAATGCTAAATTGCAAGAAGTGTG  
GCAAGTGGCTTGAACCTCTGAAAAACCTTAGATTTGAAATTAAGTGCATCCCAA  
CTTAATTGAGTATGTTAAGCAGAATATCGATAACTTGATGACCCCAAGGAGTTG  
GCCTTACCCTGCCTTACGTGTTCTCTGTAATGTTGCATGCCACCACCTCCTGTTG  
AAGGTCAACAGAAAGATCTGAAATGGAATCTTGCCGTTATTCAGCTTTTTTCTGCT  
GAAGGAATGGACACGTTTATTCGAGTTCTGCAAAAATTGAACAGTATTCTGACTCA  
GCCTTGGAGGCTCCATGTCAACATGGGGACTACCCTTCACAGAGTTACTACTATTT  
CAATGGCTCGCTGCACACTCACTCTTCTTAAAAGTATGTTAACGGAAGTCTGAGA  
GGTGGATCCTTTGAGTTTAAAGACATGCGTGTTCCTTCAGCGCTTGTACTTTACAT  
ATGCTCCTGTGCTCTATCCCCCTCTCAGGTCGTTTGGATAGTGATGAACAGAAAAT  
TCAGAATGATATCATTGATATTTTACTGACTTTTACACAAGGAGTTAATGAAAAACT  
CACAATCTCAGAAGAGACTCTGGCCAATAATACTTGGTCTTTAATGTTAAAAGAAG  
TTCTTTCTCAATCTTGAAGGTTCTGAAGGATTTTTTTCTGGACTCATACTCCTTT  
CAGAGCTGCTGCCTCTTCCATTGCCATGCAAACAAGTCAAGTTATTGAGCCACAT  
GATATATCAGTGGCACTCAACACCCGAAAATTGTGGAGCATGCACCTTCATGTTCA  
AGCAAAGTTGCTCCAAGAAATAGTTCGCTCTTTCTCTGGCACAACCTGCCAGCCC  
ATCAACATATGTTACGGCGTATTTGTGTTCAATTGTGTGACCTTGCCTACCAACT  
GCACTTCTGATTATGAGAACTGTGTTGGATTTGATTGTAGAAGACTTGCAAAGCAC  
TTCAGAAGATAAAGAAAAACAGTATACTAGCCAAACCACAGGTTGCTTGCTCTT  
CTTGATGCTCTGGCTTCACACAAAGCTTGTAATTAGCTATTTTGCATCTAATTAAT  
GGAAGTATTAAAGGTGATGAAAGATATGCAGAGATATTCCAGGATCTTTTAGCTTT

GGTGCGGTCTCCTGGAGACAGTGTTATTCGCCAACAGTGTGTTGAATATGTCACAT  
CCATTTTGCAGTCTCTCTGTGATCAGGACATTGCACTTATCTTACCAAGCTCTTCTG  
AAGGTTCTATTTCTGAACTGGAGCAGCTCTCCAATTCTCTACCAATAAAGAATTG  
ATGACCTCAATCTGTGACTGTCTGTTGGCTACGCTAGCTAACTCTGAGAGCAGTTA  
CAACTGTTTACTGACATGTGTCAGAACAATGATGTTTCTTGCAGAGCATGATTATG  
GATTATTTCAATTAATAAAGTTCTTTAAGGAAAAACAGTAGTGCTCTGCATAGTTTAC  
TGAAACGAGTGGTCAGCACATTTAGTAAGGACACAGGAGAGCTTGCATCTTCATT  
TTAGAATTTATGAGACAAATTCTTAACTCTGACACAATTGGATGCTGTGGAGATG  
ATAATGGTCTCATGGAAGTAGAGGGAGCTCATAATCACGGACGATGAGTATTAAT  
GCTGCAGAGTTAAAACAGCTTCTACAAAGCAAAGAAGAAAGTCCAGAAAATTTG  
TTCCTTGAAGTAGAGAAGCTTGTTTTGGAACATTCAAAAGATGATGACAATCTGGA  
TTCTTTGTTGGACAGTGTAGTTGGACTTAAGCAGATGCTGGAGTCATCAGGTGACC  
CTTTACCTCTCAGTGACCAGGATGTAGAACCAGTACTTTCAGCTCCAGAATCTCTT  
CAGAATCTGTTTAAACAATAGGACTGCCTATGTGCTTGCTGATGTCATGGATGATCAG  
TTGAAATCTATGTGGTTCCTCCATTTTCAGGCTGAAGAGATAGATACAGATCTGGA  
TTTGGTAAAGTTGACTTAATTGAACTCTCTGAAAAATGCTGTAGTGAAGTTGATT  
TGCACTCAGAATTAGAGCGCTCATTTTTGTCAGAACCATCATCTCCAGGAAGAACC  
AAGACTACTAAAGGATTCAAACTTGGGAAGCACAAGCATGAGACCTTTATAACGT  
CAAGTGGAAAATCTGAATACATTGAACCTGCCAAAAGAGCTCATGTTGTGCCACC  
ACCAAGAGGAAGGGGCGAGGGGAGGATTTGGACAGGGTATACGACCTCATGATATT  
TTTCGTCAGAGAAAACAGAACACAAGTAGACCACCATCTATGCATGTGGATGACT  
TTGTTGCTGCTGAAAGTAAAGAAGTGGTTCCTCAAGATGGAATACCTCCACCAA  
ACGGCCACTCAAAGTATCACAGAAGATTTCTTCCCGTGGTGGGTTTTTCAGGCAATA  
GAGGAGGACGGGGTGCTTTCCACAGTCAGAATAGGTTTTTTCACACCACCTGCTTC  
AAAAGGAACTACAGTCGTCGGGAAGGAACAAGAGGCTCCAGTTGGAGTGCTCA  
GAATACTCCTCGAGGAAATTACAATGAAAGTCGTGGAGGCCAGAGCAATTTAAC  
AGAGGCCCTCTTCCACCATTACGACCCCTTAGTTCTACAGGTTACCGCCCAAGTCC  
TCGGGACCGTGCTTCTAGAGGTCGTGGGGGACTTGGACCTTCTGGGCTAGTGCA  
AATAGCGGCAGTGGAGGCTCAAGAGGAAAGTTTGTAGTGGAGGCAGTGGTAGA  
GGTCGTCATGTACGCTCCTTTACACGATAA

**Amino acid sequence (1812 aa) (C-term 1131–1812 aa in red)**

MAVDSAMELLFLDTFKHPSAEQSSHIDVVRFPVYINEVRVIPPGVRAHSSLPDNRA  
YGETSPHTFQLDLFFNNVSKPSAPVFDRLGSLEYDENTSIIFRPNSKVNTDGLVLRGW  
YNCLTLAIYGSVDRVISHDRDSPPPPPPPPPPPQPQPSLKRNPKHADGEKEDQFNGSPP  
RPQPRGPRTPPGPPPPDDDEDVPLVPSGDKEEDAPHREDYFEPISPDRNSVPQEGQ  
YSDEGEVEEEQEEEGEEDDDVDVEEEDEDEDDRRTVDSIPEEEEEDEEEEGEEDDE  
GEGDDGYEQISSDEDGIADLERETFKNFDVEYTAEDLASVPPMTYDPYDRELVPLL  
YFSCPYKTTFEIEISRMKDQGPDKENSGAIEASVKLTELDDLYREDRGAKWVTALEEIP  
SLIIKGLSYLQLKNTKQDSLGLVDWTMQUALNLQVALRQPIALNVRQLKAGTKLVSS  
LAECGAQGV TGLLQAGVISGLFELLFADHVSSSLKLNFAFKALDSVISMTEGMEAFRL  
GRQNEKSGYQKLELILLDQTVRVVTAGSAILQKCHFYEVLSEIKRLGDHLAEKTSSL  
PNHSEPDHDTDAGLERTNPEYENEVEASMDMDLLESSNISEGEIERLINLLEEVFHLM  
ETAPHTMIQQPVKSFPMTMARITGPPERDDPYPVLFYRLHSHHFLELVTLLLSIPV TSAH



PGVLQATKDVLKFLAQSQKGLLFFMSEYEATNLLIRALCHFYDQDEEEGLQSDGVID  
DAFALWLQDSTQTLQCITELFSHFQRCTASEETDHSDLLGTLHNLYLITFNPVGRSAVG  
HVFSLEKNLQSLITLMEYYSKEALGDSKSKKSVAINYACILILVVVQSSSDVQMLEQH  
AASLLKLCADENNAKLQELGKWLEPLKNLRFEINCIPNLIEYVKQNIDNLMTPEGV  
GLTTALRVLCNVACPPPPVEGQQKDLKWNLAVIQLFSAEGMDTFIRVLQKLNLSILTQP  
WRLHVNMGTTLHRVTTISMARCTLTLLKTMLTELLRGGSFEEKDMRVPSALVTLHM  
LLCSIPLSGRLDSDEQKIQNDIIDILLTFTQGVNEKLTISEETLANNTWSLMLKEVLSSIL  
KVPEGFFSGLILLSELLPLPLMQTTQVIEPHDISVALNTRKLVSMHLHVQAKLLQEIV  
RSFSGTTCQPIQHMLRRICVQLCDLASPTALLIMRTVLDLIVEDLQSTSEDKEKQYTSQ  
TTRLLALLDALASHKACKLAILHLINGTIKGDERYAEIFQDLLALVRSPGDSVIRQQCV  
EYVTSILQSLCDQDIALILPSSSEGSISELEQLSNSLPNKELMTSICDCLLATLANSESSY  
NCLLTCVRTMMFLAEHDYGLFHLKSSLRKNSSALHSSLKRVVSTFSKDTGELASSFLE  
FMRQILNSDTIGCCGDDNGLMEVEGAHTSRTMSINAAELKQLLQSKEESPENLFLELE  
KLVLEHSDDDNLDLSDSVVGLKQMLESSGDPLPLSDQDVEPVLSAPESLQNLFN  
RTAYVLADVMDDQLKSMWFTPFQAEIDTDLVLDLIESEKCCSDFDLHSELER  
SFLSEPSSPGRTKTTKGFGLGKHKHETFITSSGKSEYIEPAKRAHVPPPRGRGRGGFG  
QGIRPHDIFRQRKQNTSRPPSMHVDDFVAESKEVVPQDGIPPKRPLKVSQKISSRG  
GFSGNRGGRGAFHSQNRFFTPPASKGNYSRREGTRGSSWSAQNTPRGNYNESRGGQ  
SNFNRGPLPLRPLSSTGYRPSRDRASRGRGGLGPSWASANSRGGSRGKRVSSGSG  
RGRHVRSFTR

### Human *VIRMA* N-terminal (KIAA1429 Isoform 2)

Nucleotide sequence: 3444 nt

ATGGCGGTGGACTCGGCGATGGAGCTGTTATTTTTAGATACTTTTAAACACCCGAG  
CGCTGAGCAAAGTTCATATAGATGTGGTTCGTTTTCCATGTGTGGTTTATATCAA  
TGAAGTCCGAGTCATACCCCCAGGAGTAAGAGCCCATAGCAGTCTGCCAGACAAT  
AGAGCATATGGAGAGACATCTCCCCATACATTTCAATTAGACTTATTCTTCAACAAT  
GTAAGCAAACCAAGTGCCCCTGTTTTTCGATAGGTTGGGAAGCCTGGAATATGATG  
AGAATACTTCCATCATCTTTAGACCTAACTCAAAGGTGAATACTGATGGTCTGGTG  
CTAAGAGGCTGGTATACTGTCTGACACTGGCAATATATGGATCAGTGGATAGAGT  
GATAAGTCATGACAGAGACTCTCCACCACCACCACCTCCACCGCCACCACCTCCC  
CAGCCACAACCAAGTTTGAAAAGGAATCCAAAACATGCTGATGGGGAGAAAGAA  
GATCAGTTTAATGGAAGCCCTCCAAGACCACAGCCAAGGGGACCAAGAAGCTCCTC  
CAGGACCCCTCCACCTGATGATGATGAAGATGATCCTGTGCCTCTGCCAGTGTCT  
GGTGACAAGGAAGAGGATGCTCCTCATAGAGAAGATTACTTTGAGCCATTTCTC  
CTGATCGGAATTCTGTTCCCCAGGAAGGGCAATATTCTGATGAAGGAGAAGTAGA  
AGAGGAACAACAAGAAGAAGGAGAAGAAGATGAAGATGATGTGGATGTAGAGG  
AAGAAGAGGATGAGGATGAGGATGATCGACGAACAGTAGACAGTATTCTGAGG  
AGGAAGAGGAAGATGAAGAGGAAGAAGGTGAAGAGGATGAAGAAGGTGAAGGG  
GATGATGGTTATGAACAAATTTCCAGTGATGAAGATGGAATTGCTGACTTGGAACG  
TGAAACATTTAAGTATCCAAACTTTGATGTTGAATACTGCTGAAGACTTAGCTT  
CAGTTCCTCCTATGACATATGATCCATATGACAGGGAGCTTGTACCACTCTTATACT  
TCAGTTGTCCATACAAGACTACTTTTGAAATTGAAATCAGTAGAATGAAGGATCAA

GGTCCAGATAAAGAAAATTCAGGGGCAATCGAAGCCTCAGTGAAGTTAACAGAA  
CTCTTAGATTTGTATAGAGAAGATAGAGGTGCAAAATGGGTAACAGCTTTAGAAGA  
AATCCAAGTTTAATAATAAAAGGGTTAAGCTATTTGCAATTGAAAAACACAAAAC  
AAGACTCCCTTGGCCAGTTGGTAGACTGGACCATGCAAGCTTTAAATTTACAAGTA  
GCGCTTCGCCAACCTATCGCCTTAAATGTTGACAGCTCAAAGCTGGGACCAAATT  
AGTGTCTCACTAGCAGAATGTGGGGCTCAAGGAGTTACAGGACTGCTACAAGCA  
GGAGTGATCAGTGGATTATTTGAACTTCTGTTTGTCTGATCACGTATCATCTTCTCTT  
AAGTTAAATGCTTTTAAAGCTTTGGACAGTGTTCATTAGTATGACAGAAGGAATGGA  
AGCTTTTTTAAGAGGTAGGCAGAATGAAAAAGTGGTTATCAAAGCTTCTGGAA  
CTCATACTTTTAGATCAGACTGTGAGGGTTGTTACTGCTGGTTCAGCTATTCTCCAA  
AAATGCCATTTCTATGAAGTCTTGTGACAGATTAAGAAAGACTTGGTGACCATTTAGC  
AGAGAAGACTTCATCTCTTCTAACCACAGTGAACCTGATCACGACACAGATGCT  
GGACTTGAGAGAACAAACCCAGAATATGAAAATGAGGTGGAAGCTTCTATGGATA  
TGGATCTTTTGAATCCTCAAATATAAGTGAAGGGGAAATAGAAAGGCTTATTAAC  
CTCCTAGAAGAAGTTTTTCATTTAATGGAACTGCCCTCATACAATGATCCAACA  
ACCTGTTAAGTCTTTCCCAACGATGGCACGAATTACTGGACCTCCAGAGAGGGAT  
GATCCATACCCTGTTCTCTTTAGATATCTTCACAGTCATCACTTCTTGGAGTTGGTT  
ACCTTGCTTCTGTCAATTCAGTAACAAGTGCTCACCTGGTGTGCTGCAAGCCAC  
AAAAGATGTTTTGAAGTTTTCTTGCACAGTCACAGAAGGGTCTTCTTTTTTTTATGT  
CGGAATATGAAGCAACAAATTTATTGATCCGAGCTCTGTGTCACTTTTATGATCAAG  
ATGAGGAGGAAGGTCTCCAATCTGATGGTGTATTGATGATGCATTTGCCTTGTGG  
CTACAGGACTCAACACAGACATTGCAATGTATTACAGAACTGTTTCAGCCATTTTCA  
GCGTTGTACAGCCAGTGAAGAAACAGACCATTCAGATCTCTTGGGAACCTGCAC  
AATCTTTATTTGATTACTTTTAATCCTGTGGGAAGATCAGCTGTTGGCCATGTTTTTA  
GTCTGGAGAAAATCTCCAAAGTCTTATTACTCTAATGGAGTACTATTCCAAGAA  
GCCTTGGGTGATTCCAAATCTAAGAAGTCAGTAGCTTATAATTACGCATGCATACTT  
ATTTTGGTGGTGGTTCAGTCTTCCAGTGATGTTCAAATGCTAGAACAACATGCAGC  
ATCTCTCTTGAAGCTTTGTAAAGCAGATGAAAATAATGCTAAATTGCAAGAACTTG  
GCAAGTGGCTTGAACCTCTGAAAAACCTTAGATTTGAAATTAAGTGCATCCCAA  
CTTAATTGAGTATGTTAAGCAGAATATCGATAACTTGATGACCCCAAGGAGTTG  
GCCTTACCCTGCCTTACGTGTTCTCTGTAATGTTGCATGCCACCACCTCCTGTTG  
AAGGTCAACAGAAAGATCTGAAATGGAATCTTGCCGTTATTCAGCTTTTTTCTGCT  
GAAGGAATGGACACGTTTATTCGAGTTCTGCAAAAATTGAACAGTATTCTGACTCA  
GCCTTGGAGGCTCCATGTCAACATGGGGACTACCCTTCACAGAGTTACTACTATTT  
CAATGGCTCGCTGCACACTCACTCTTCTTAAACTATGTTAACGGAACTCCTGAGA  
GGTGGATCCTTTGAGTTTAAGGACATGCGTGTTCCTTCAGCGCTTGTTACTTTACAT  
ATGCTCCTGTGCTCTATCCCCCTCTCAGGTCGTTTGGATAGTGATGAACAGAAAAT  
TCAGAATGATATCATTGATATTTTACTGACTTTTACACAAGGAGTTAATGAAAACT  
CACAATCTCAGAAGAGACTCTGGCCAATAATACTTGGTCTTTAATGTTAAAAGAAG  
TTCTTTCTCAATCTTGAAGGTTCCCTGAAGGATTTTTTTCTGGACTCATACTCCTTT  
CAGAGCTGCTGCCTCTTCCATTGCCCATGCAAACAACCTCAGGTATCACTTCCATAT  
AACATGCATCTTATAAATGACTGCAGTAACACTTTTTAA

**Amino acid sequence(1147 aa)**

MAVDSAMELLFLDTFKHPSAEQSSHIDVVRFPVYINEVRVIPPGVRAHSSLPDNRA  
YGETSPHTFQLDLFFNNVSKPSAPVFDRLGSLEYDENTSIIIFRPNKSVNTDGLVLRGW  
YNCLTLAIYGSVDRVISHDRDSPPPPPPPPPPPPPQPSLKRNPKHADGEKEDQFNGSPP  
RPQPRGPRTPPGPPPPDDEDDPVPLPVSGDKEEDAPHREDFEPISPDRNSVPQEGQ  
YSDEGEVEEEQEEGEEDEDDVDVEEEDEDEDEDRRTVDSIPEEEEEDEEEEGEEDDEE  
GEGDDGYEQISSDEDDGIADLERETFKYPNFDVEYTAEDLASVPPMTYDPYDRELVPLL  
YFSCPYKTTFEIEISRMKDQGPDKENSGAIEASVKLTELLEDLYREDRGAKWVTALEEIP  
SLIIKGLSYLQLKNTKQDSLGLVDWMTQALNLQVALRQPIALNVRQLKAGTKLVSS  
LAECGAQGVGTGLLQAGVISGLFELLFADHVSSSLKLNALFKALDSVISMTEGMEAFRL  
GRQNEKSGYQKLELILLDQTVRVVTAGSAILQKCHFYEVLSEIKRLGDHLAEKTSSL  
PNHSEPDHDTDAGLERTNPEYENEVEASMDMDLLESSNISEGEIERLINLLEEVFHLM  
ETAPHTMIQQPVKSFPPTMARITGPPERDDPYPVLFVRYLHSHHFLELVTLLLSIPVTSAH  
PGVLQATKDVLFKFLAQSQKGLLFFMSEYEATNLLIRALCHFVDQDEEEGLQSDGVID  
DAFALWLQDSTQTLQCITELFSHFQRCTASEETDHSDDLGLTLHNLYLITFNPVGRSAVG  
HVFSLEKNLQSLITLMEYYSKEALGDSKSKKSVAAYNYACILILVVVQSSSDVQMLEQH  
AASLLKLCADENNAKLQELGKWLEPLKNLRFENCIPNLIEYVKQNIDNLMTPGEV  
GLTTALRVLCNVACPPPPVEGQQKDLKWNLAVIQLFSAEGMDTFIRVLQKLNLSILTQP  
WRLHVNMGTTLHRVTTISMARCTLTLLKTMLTELLRGGSFEFKDMRVPSALVTLHM  
LLCSIPLSGRLDSDEQKIQNDIIDILLTFTQGVNEKLTISEETLANNTWSLMLKEVLSSIL  
KVPEGFFSGLILLSELLPLPLPMQTTQVSLPYNMHLINDCSNTF

**Human *ZC3H13* full length (*ZC3H13* Isoform 1, NM\_001076788.1)**

Nucleotide sequence: 5010 nt (Sequences in blue and in red are defined as *ZC3H13* N-term and C-term)

ATGTCAAAAATTAGAAGGAAGGTCACAGTGGAAAATACCAAGACTATATCTGAT  
AGCACATCCCGAAGACCCAGTGTATTTGAGAGGCTTGGACCCAGCACTGGCAGT  
ACAGCAGAGACACAGTGCCGTAAGTGGCTGAAGACTGGCAACTGCCTCTATGGA  
AACACATGTAGATTCGTACATGGCCCTTCACCTCGTGGTAAAGGTTATAGCAGCA  
ATTATAGAAGGTCACCAGAAAGACCTACAGGGGATCTTAGAGAAAGAATGAAG  
AACAAAGCGCCAAGACGTGGACACTGAGCCCCAGAAACGAAATACAGAGGAGTC  
ATCCTCACCTGTTAGGAAAGAATCTTCAAGAGGGAGACATAGGGAAAAGGAAGA  
CATAAAAATCACTAAGGAAAGAACTCCAGAAAGTGAAGAAGAAAATGTAGAAT  
GGGAAACTAATAGAGATGATTCTGACAATGGAGATATTAATTATGATTATGTTCA  
TGAATTGTCATTGGAAATGAAGCGTCAGAAGATACAGAGGGAATTAATGAAGCT  
GGAACAAGAAAACATGGAGAAGAGAGAAGAAATTATCATTAAAAAGGAGGTTT  
CACCAGAAGTGGTTAGATCAAAAATTGTCCCCGTCACCTTCTCTAAGAAAGTCTAG  
CAAATCTCCGAAGCGAAAATCAAGCCCGAAGTCGTCTTCAGCTAGCAAGAAAGA  
TAGGAAGACATCTGCAGTATCTTCTCCCCTGTTGGACCAGCAGAGAAATTCAAAA  
ACCAACCAAAGTAAAAAGAAAGGACCACGTACTCCTAGTCCACCCCTCCTATA  
CCAGAAGATATCGCTCTGGGGAAAAAATACAAAGAAAAATATAAAGTAAAAGA  
CAGGATAGAAGAAAAACAAGAGATGGAAAGGACAGAGGACGAGATTTTGAAC

GACAAAGAGAAAAGAGAGACAAGCCAAGGTCTACTTCCCCAGCAGGACAGCAT  
CATTCTCCTATATCTTCTAGACATCACTCATCTTCCTCACAATCAGGATCATCTAT  
TCAAAGACATTCTCCTTCTCCTCGTCGAAAAAGAACTCCTTCACCATCTTATCAG  
CGGACACTAACTCCACCTTTACGACGCTCTGCCTCTCCTTATCCTTCACATTCTTT  
GTCGTCTCCCCAGAGAAAGCAGAGTCCTCCAAGACATCGCTCTCCAATGCGAGA  
GAAAGGGAGACATGATCATGAACGAACTTCACAGTCTCATGATCGACGCCATGA  
AAGGAGGGAAGATACTAGGGGCAAACGAGACAGAGAAAAGGACTCAAGAGAA  
GAACGAGAATATGAACAGGATCAGAGCTCTTCTAGAGACCACAGAGATGACAGA  
GAACCTCGAGATGGTTCGGGATCGGAGAGATGCCAGAGATACTAGGGACCGAAG  
GGAACTAAGAGACTCCAGAGACATGCGGGACTCAAGGGAGATGAGAGATTATA  
GCAGAGATAACAAAGAGAGCCGTGATCCCAGAGATTCTCGGTCCACTCGTGATG  
CCCATGACTACAGGGACCGTGAAGGTCGAGATACTCATCGAAAGGAGGATACAT  
ATCCAGAAGAATCCCAGGAGTTATGGCCGAAACCATTTGAGAGAAGAAAGTTCTC  
GTACGGAAATAAGGAATGAGTCCAGAAATGAGTCTCGAAGTGAAATTAGAAATG  
ACCGAATGGGCCGAAGTAGGGGGAGGGTTCCTGAGTTACCTGAAAAGGGAAGTC  
GAGGCTCAAGAGGTTCTCAAATTGATAGTCAAGTAGTAATAGCAACTATCATG  
ACAGCTGGGAAACTCGAAGTAGCTATCCTGAAAGAGATAGATATCCTGAAAGAG  
ACAACAGAGATCAAGCAAGGGATTCTTCTTTGAGAGAAGACATGGAGAGCGAG  
ACCGTCGTGACAACAGAGAGAGAGATCAAAGACCAAGCTCACCAATTCGACATC  
AGGGAAGGAATGACGAGCTTGAGCGTGATGAAAGAAGAGAGGAACGAAGAGTA  
GACAGAGTGGATGATAGGAGAGATGAAAGGGCTAGAGAGAGAGATCGGGAACG  
AGAACGAGACAGGGAGCGGGAGAGAGAGAGAGGGAACGTGAACGGGATCGGGAA  
AGAGAAAAAGAGAGAGAAGTAGAAAGAGAGCGTGCTAGGGAACGGGAGAGAG  
AAAGAGAAAAAGAGAGAGATCGTGAAAGGGATAGAGACCGAGACCACGATCGA  
GAGCGGGAAAGAGAGAGGGAAACGAGACAGGGAAAAAGAACGGGAACGAGAAA  
GAGAAGAGAGAGAGAGGGAGAGAGAGCGGAGAACGGGAGAGAGAGCGAGAGCG  
AGAACGGGAACGAGAAAGAGCGAGAGAAAGGGATAAAGAACGAGAACGCCAA  
AGGGATTGGGAAGACAAAGACAAAGGACGAGATGACCGCAGAGAAAAGCGAGA  
AGAGATCCGAGAAGATAGGAATCCAAGAGATGGACATGATGAAAGAAAATCAA  
AGAAGCGCTATAGAAATGAAGGGAGTCCCAGCCCTAGACAGTCCCCGAAGCGCC  
GGCGTGAACATTCTCCGGACAGTGATGCCTACAACAGTGGAGATGATAAAAATG  
AAAAACACAGACTCTTGAGCCAAGTTGTACGACCTCAAGAATCTCGTTCTCTTAG  
TCCCTCGCACCTCACAGAAGACAGACAGGGTAGATGGAAAGAGGAGGATCGTAA  
ACCAGAAAGGAAAGAGAGTTC AAGGCGCTACGAAGAACAGGAACTCAAGGAGA  
AAGTTTCTTCTGTAGATAAACAGAGAGAACAGACAGAAATCCTGGAAAGCTCAA  
GAATGCGTGACAGGACATTATAGGACACCACCAGTCTGAAGATCGAGAGACAT  
CTGATCGAGCTCATGATGAAAACAAGAAGAAAGCAAAAATTCAAAGAAACCA  
ATTAAGAAAAAGAAAGAGGATGATGTTGGAATAGAGAGGGGTAACATAGAGAC  
AACATCTGAAGATGGTCAAGTATTTTCACCAAAAAAGGACAGAAAAAGAAAA  
GCATTGAAAAAAAACGTAAAAAATCCAAAGGTGATTCTGATATTTCTGATGAAG  
AAGCAGCCCAGCAAAGTAAGAAGAAAAGAGGCCACCGACTCCCCCTATAACA  
ACTAAAGAGGAATTGGTTGAAATGTGCAATGGTAAGAATGGTATTCTAGAGGAC  
TCCAGAAAAAGAAGATAACAGCATTCAGTGAAGTGGTCTGATGAGGATGTCCCT  
GACCGTACAGAGGTGACAGAAGCAGAGCATACTGCCACCGCCACGACTCCTGGT

AGTACCCCTTCTCCTCTATCTTCTCTTCTTCTCCTCCTCCACCGCCTGTGGCTACTGCC  
ACTGCTACAACGTGCCTGCAACTCTTGCTGCCACTACTGCTGCTGCCGCCACCT  
CTTTCAGCACATCTGCCATCACTATTTCCACCTCTGCCACCCCCACCAATACCACC  
AATAATACTTTTGCCAATGAAGACTCACACAGAAAATGCCACAGAACACGAGTA  
GAAAAAGTAGAGACGCCTCACGTGACTATAGAAGATGCACAGCATCGCAAGCCT  
ATGGATCAAAGAGGAGCAGCAGCCTCGGGAGCAATCGGAGTAACCGTAGTCAT  
ACGTCTGGTCGTCTTCGCTCCCCATCCAATGATTCAGCCCATCGAAGTGGAGATG  
ACCAAAGTGGTCGAAAGAGAGTACTGCACAGTGGCTCAAGAGATAGAGAAAA  
ACAAAAAGCCTGGAAATCACAGGAGAGAGAAAATCTAGGATTGATCAGTTAAA  
GCGTGGAGAACCAGTCGAAGTACTTCTTCAGATCGCCAGGATTCAAGAAGCCA  
TAGTTCAAGAAGAAGTTCTCCAGAGTCAGATCGACAGGTCCATTCAAGATCTGG  
GTCATTTGATAGCAGAGACAGGCTTCAAGAACGAGATCGATATGAACACGACAG  
AGAGCGCGAGAGAGAGAGAGGAGAGATACGAGGCAGAGAGAATGGGACCGAGAT  
GCTGATAAAGATTGGCCACGCAACAGGGATCGAGATAGATTGCGAGAACGAGA  
ACGAGAGAGAGAACGAGACAAAAGGAGAGACTTGGATAGGGAAAGAGAGAGA  
CTAATTTCTGATTCTGTTGAAAGGGACAGGGACAGAGACAGAGACAGAATTTT  
GAGAGTTCTCAAATAGAGTCTGTGAAACGCTGTGAAGCAAAACTGGAAGGTGAA  
CATGAAAGGGATCTAGAAAGCACTTCCCGAGACTCTCTAGCCTTGGATAAAGAG  
AGAATGGATAAAGATCTGGGATCTGTGCAGGGATTTGAAGAAACAAATAAATCC  
GAGAGAACTGAGAGTCTGGAAGCAGGAGATGACGAGTCCAAGTTAGATGATGC  
ACATTCATTAGGCTCTGGTGCTGGAGAAGGATACGAGCCAATCAGTGATGACGA  
ACTAGATGAAATTCTGGCAGGTGATGCAGAAAAGAGGGAGGACCAACAGGATG  
AGGAGAAGATGCCAGATCCCTTAGATGTGATAGATGTGGATTGGTCTGGTCTTAT  
GCCAAAGCATCCAAAAGAACCACGAGAGCCTGGGGCTGCACTCTTAAAATTCAC  
ACCTGGAGCTGTTATGCTAAGAGTTGGGATTTCTAAAAAGTTGGCAGGTTCTGAA  
CTCTTTGCCAAAGTCAAAGAAACATGTCAGAGACTTTTAGAAAAACCCAAAGAT  
GCAGACAATCTCTTTGAACATGAATTGGGGGCTCTCAATATGGCTGCATTACTAC  
GAAAAGAAGAAAGAGCAAGTCTTCTTAGTAATCTTGGCCCATGTTGTAAGGCGTT  
GTGCTTCAGACGGGATTCTGCAATTCGAAAGCAGCTTGTTAAAAATGAGAAGGG  
CACCATAAAACAAGCTTACACGAGTGCTCCAATGGTAGACAATGAATTACTTCG  
ATTGAGTCTTCGGTTATTTAAGCGGAAGACTACTTGCCATGCTCCAGGACATGAA  
AAGACTGAAGATAATAAACTTTCACAGTCCAGTATCCAACAGGAACTGTGTGTG  
TCTTAA

**Amino acid sequence (1669 aa) (N-term 1-1106 aa in blue, C-term 1107–1669 aa in red)**

MSKIRRKVTVENTKTISDSTSRRPSVFERLGPSTGSTAETQCRNWLKTGNCLYGNTC  
RFVHGSPRGKGYSSNYRRSPERPTGDLRERMKNKRQDVDTEPQKRNTEESSSPVRK  
ESSRGRHREKEDIKITKERTPESEENVEWETNRDSDNGDINYDYVHELKLEMKRQ  
KIQRELMKLEQENMEKREEIIKKEVSPEVVRSKLSPSPSLRKSSKSPKRKSSPKSSSAS  
KKDRKTS AVSSPLLDQQRNSKTNQSKKKGPRTSPPPPPIPEDIALGKKYKEYKVKD  
RIEKTRDQKDRGRDFERQREKRDKPRSTSPAGQHHSPSSRHSSSSQSGSSIQRHSP  
SPRRKRTPSPSYQRTLTPPLRRSASPYPHSLSSPQRKQSPPRHRSPMREKGRHDHERT  
SQSHDRRHERREDTRGKRDREKDSREEREYEQDQSSSRDHRDDREPRDGRDRRDAR  
DTRDRREL RDSRDMRDSREMRDYSRDTKESRDRDRSRSTRDAHDYRDREGRDTHR

KEDTYPEESRSYGRNHLREESSRTEIRNESRNESEIRNDRMGRSRGRVPELPEKGS  
RGSRGSQIDSHSSNSNYHDSWETRSSYPERDRYPERDNRDQARDSSFERRHGERDRR  
DNRERDQRPSSPIRHQGRNDELERDERREERRVDRVDDRRDERARERDRERERDR  
RERERERERDREREKERELERERAREREREREKERDRERDRDRDHDREERERERDR  
EKEREREREERERERERERERERERERERERERARERDKERERQRDWEDKDKGRDDRR  
EKREEIREDRNPDRGHDERKSKKRYRNEGSPSPRQSPKRRREHSPDSDAYNSGDDKN  
EKHRLLSQVVRPQESRSLSPSHLTEDRQGRWKEEDRKPERKESSRRYEEQELKEKVS  
SVDKQREQTEILESSRMRAQDIIGHHQSEDRETSRAHDENKKKAKIQKKPIKKKKE  
DDVGIERGNIETTSEDGQVFSPPKKGQKKKSIKKRKKKSKGSDISDEEAAQQSKKKR  
GPRTPPITTKHEELVEMCNGKNGILEDSQKKEDTAFSDWSEDEDVPDRTEVTEAEHTAT  
ATTPGSTPSPSSLLPPPPP VATATATTVPATLAATTA AAAATSFSSTSAITISTSATPTNTT  
NNTFANEDSHRKCHRTRVEKVETPHVTIEDAQHRKPMQKRSSSLGNSRNSRSHTS  
RLRSPSNDSAHRSRSGDDQSGRKRVLHSGSRDREKTKSLEITGERKSRIDQLKRGEP  
SRSTSSDRQDSRSHSSRRSSPESDRQVHSRSGSFDSDRLQERDRYEHDRERERERDR  
TRQREWDRDADKDWPRNRDRDRLRERERERERERDKRRDLDRERERLISDSVERDRDR  
DRDRTFESSQIESVKRCEAKLEGEHERDLESTSRDSLALDKERMDKDLGVSQGFEE  
TNKSERTESLEAGDDESKLDDAHSLSGSGAGEGYEPISDDELDEILAGDAEKREDQ  
QDEEKMPDPLDVIDVDWSGLMPKHPKEPREPGAALLKFTPGAVMLRVGISKLAGSE  
LFAKVKETCQRLLEKPKDADNLFEHEL GALNMAALLRKEERASLLSNLGPCCALCF  
RRDSAIRKQLVKNEKGTIKQAYTSAPMVDNELLRLSLRLFKRKTTCHAPGHEKTED  
NKLSQSSIQQELCVS

## Supplementary table legends

**Table S1** Proteomic data of METTL3, METTL14, WTAP, and VIRMA

**Table S2** Brief summary of high throughput sequencing data

**Table S3** Examples for m<sup>6</sup>A peak annotations in *VIRMA*<sup>mut/-</sup> and control samples

**Table S4** The list of whole transcriptome showing the changes of m<sup>6</sup>A peak and expression level between *VIRMA*<sup>mut/-</sup> and control samples

**Table S5** Summary of upregulated m<sup>6</sup>A-containing genes with change of expression more than 2 folds by comparing *VIRMA*<sup>mut/-</sup> with control

**Table S6** Summary of GO enrichment network of differentially expressed m<sup>6</sup>A-containing genes

**Table S7** Summary of VIRMA RIP targets and its overlap with m<sup>6</sup>A-seq targets

**Table S8** Lists of genes showing mRNA 3`UTR length change under depletion of VIRMA, METTL3 and CPSF5 versus control

**Table S9** Primers and siRNA sequences used in this work

**Table S10** Antibodies used in this work
